# Supplementary material
Source: PubMed Central journal article supplement (PMC3017225)
Supplement: NIHMS222801-supplement-supplement_1.pdf [file NIHMS222801-supplement-supplement_1.pdf]

Table 3. Proportion of children who often or always have problems with physical, emotional, social or school functioning according to individual Pediatric Quality of Life Inventory (PedsQL) items stratified by Strabismus<sup>a</sup>

|                                                      | Total Sample (N=4,218)                |                                  |                      | Children (2-4 yr) (N=2,168)           |                                 |                 | Children (4-6 yr) (N=2,050)           |                                 |                      |
|------------------------------------------------------|---------------------------------------|----------------------------------|----------------------|---------------------------------------|---------------------------------|-----------------|---------------------------------------|---------------------------------|----------------------|
|                                                      | Children without Strabismus (N=4,097) | Children with Strabismus (N=121) | p-value <sup>b</sup> | Children without Strabismus (N=2,124) | Children with Strabismus (N=44) | p-value         | Children without Strabismus (N=1,973) | Children with Strabismus (N=77) | p-value <sup>b</sup> |
| <b>Physical functioning</b>                          |                                       |                                  |                      |                                       |                                 |                 |                                       |                                 |                      |
| 1 Problem with walking                               | 46 (1.12)                             | 6 (4.96)                         | <b>&lt;0.01</b>      | 22 (1.04)                             | 1 (2.27)                        | 0.38            | 24 (1.22)                             | 5 (6.49)                        | <b>&lt;0.01</b>      |
| 2 Problem with running                               | 52 (1.27)                             | 5 (4.13)                         | <b>0.02</b>          | 25 (1.18)                             | 1 (2.27)                        | 0.42            | 27 (1.37)                             | 4 (5.19)                        | <b>0.03</b>          |
| 3 Problem with participating exercise                | 49 (1.20)                             | 5 (4.13)                         | <b>0.02</b>          | 27 (1.27)                             | 1 (2.27)                        | 0.44            | 22 (1.12)                             | 4 (5.19)                        | <b>0.01</b>          |
| 4 Problem with lifting something heavy               | 73 (1.78)                             | 5 (4.17)                         | 0.07                 | 25 (1.18)                             | 1 (2.27)                        | 0.42            | 48 (2.43)                             | 4 (5.26)                        | 0.12                 |
| 5 Problem with taking a bath or shower               | 70 (1.71)                             | 6 (4.96)                         | <b>0.02</b>          | 23 (1.08)                             | 1 (2.27)                        | 0.39            | 47 (2.38)                             | 5 (6.49)                        | <b>0.04</b>          |
| 6 Problem with doing chores                          | 329 (8.03)                            | 13 (10.74)                       | 0.31                 | 172 (7.93)                            | 2 (4.55)                        | 0.58            | 157 (7.96)                            | 11 (14.29)                      | 0.056                |
| 7 Problem with having hurts or aches                 | 69 (1.68)                             | 8 (6.61)                         | <b>&lt;0.01</b>      | 29 (1.37)                             | 1 (2.27)                        | 0.46            | 40 (2.03)                             | 7 (9.09)                        | <b>&lt;0.01</b>      |
| 8 Problem with low energy level                      | 18 (0.44)                             | 1 (0.83)                         | 0.43                 | 8 (0.38)                              | 1 (2.27)                        | 0.17            | 10 (0.51)                             | 0                               | 1                    |
| <b>Emotional functioning</b>                         |                                       |                                  |                      |                                       |                                 |                 |                                       |                                 |                      |
| 1 Problem with feeling afraid or scared              | 208 (5.08)                            | 10 (8.26)                        | 0.14                 | 106 (4.99)                            | 3 (6.82)                        | 0.48            | 102 (5.17)                            | 7 (9.09)                        | 0.19                 |
| 2 Problem with feeling sad or blue                   | 55 (1.34)                             | 8 (6.61)                         | <b>&lt;0.01</b>      | 22 (1.04)                             | 2 (4.55)                        | 0.08            | 33 (1.67)                             | 6 (7.79)                        | <b>&lt;0.01</b>      |
| 3 Problem with feeling angry                         | 408 (9.96)                            | 21 (17.36)                       | <b>0.01</b>          | 223 (10.50)                           | 6 (13.64)                       | 0.46            | 185 (9.38)                            | 15 (19.48)                      | <b>&lt;0.01</b>      |
| 4 Problem with trouble sleeping                      | 150 (3.66)                            | 10 (8.26)                        | <b>0.02</b>          | 71 (3.35)                             | 6 (13.64)                       | <b>&lt;0.01</b> | 79 (4.00)                             | 4 (5.19)                        | 0.55                 |
| 5 Problem with worry what will happen to him/her     | 47 (1.15)                             | 4 (3.36)                         | 0.054                | 8 (0.38)                              | 2 (4.65)                        | <b>0.02</b>     | 39 (1.98)                             | 2 (2.63)                        | 0.66                 |
| <b>Social functioning</b>                            |                                       |                                  |                      |                                       |                                 |                 |                                       |                                 |                      |
| 1 Problem with getting along with other children     | 127 (3.10)                            | 6 (4.96)                         | 0.28                 | 77 (3.63)                             | 2 (4.55)                        | 0.67            | 50 (2.53)                             | 4 (5.19)                        | 0.14                 |
| 2 Problem with other kids not wanting be friend      | 117 (2.86)                            | 6 (5.00)                         | 0.16                 | 58 (2.74)                             | 1 (2.27)                        | 1               | 59 (2.99)                             | 5 (6.58)                        | 0.09                 |
| 3 Problem with getting teased by other children      | 61 (1.49)                             | 4 (3.31)                         | 0.12                 | 20 (0.94)                             | 1 (2.27)                        | 0.35            | 41 (2.08)                             | 3 (3.90)                        | 0.23                 |
| 4 Problem with not able to do things that others can | 68 (1.66)                             | 8 (6.61)                         | <b>&lt;0.01</b>      | 30 (1.41)                             | 3 (6.82)                        | <b>0.03</b>     | 38 (1.93)                             | 5 (6.49)                        | <b>0.02</b>          |
| 5 Problem with keeping up with other children        | 42 (1.03)                             | 4 (3.31)                         | <b>0.04</b>          | 22 (1.04)                             | 1 (2.27)                        | 0.38            | 20 (1.01)                             | 3 (3.90)                        | 0.052                |
| <b>School functioning<sup>c</sup></b>                |                                       |                                  |                      |                                       |                                 |                 |                                       |                                 |                      |
| 1 Problem with paying attention in class             | 78 (4.78)                             | 4 (6.56)                         | 0.53                 | 0                                     | 0                               | -               | 78 (4.78)                             | 4 (6.56)                        | 0.54                 |
| 2 Problem with forgetting things                     | 50 (3.06)                             | 6 (10.00)                        | <b>0.01</b>          | 0                                     | 0                               | -               | 50 (3.06)                             | 6 (10.00)                       | <b>0.01</b>          |
| 3 Problem with keeping up with school activities     | 49 (2.11)                             | 1 (1.37)                         | 1                    | 15 (2.24)                             | 0                               | -               | 34 (2.06)                             | 1 (1.64)                        | 1                    |
| 4 Problem with missing school (not feel well)        | 26 (1.12)                             | 2 (2.74)                         | 0.21                 | 6 (0.89)                              | 0                               | -               | 20 (1.21)                             | 2 (3.28)                        | 0.18                 |
| 5 Problem with missing school (go to hospital)       | 26 (1.12)                             | 4 (5.48)                         | <b>0.01</b>          | 8 (1.19)                              | 0                               | -               | 18 (1.09)                             | 4 (6.56)                        | <b>0.01</b>          |

<sup>a</sup> In each cell, the numbers are counts and percents are in parenthesis. The sample size for each cell may slightly vary due to missing.

<sup>b</sup> The fisher's exact test is used .

<sup>c</sup> About 1/3 of the children don't have data on school functions.
